# Supplementary material for: Island shapes and aggregation steered by the geometry of the substrate lattice
Source: Royal Society of Chemistry journal article supplement (doi:10.1039/c2cc31339a), 2012-01-01
Supplement: c2cc31339a.pdf [file c2cc31339a.pdf]

## Supplementary information

### Island shape and aggregation steered by the geometry of the substrate lattice

M. B. Casu\*, S.-A. Savu, B.-E. Schuster, I. Biswas, C. Raisch, H. Marchetto, Th. Schmidt, T. Chassé

\*benedetta.casu@uni-tuebingen

### Experimental details

The measurements were performed at the SMART (Spectro-Microscope with Aberration correction for many Relevant Techniques) an aberration-corrected spectromicroscope, installed at the UE49-PGM-b-SMART at BESSY (Berlin, Germany). This instrument allows to investigate the film growth in-situ and in real time quasi-simultaneously by imaging, diffraction, and spectroscopy of the emitted photoelectrons. A clean Au(111) single crystal was prepared by several cycles of Ar<sup>+</sup> ion bombardment, followed by annealing in ultra high vacuum (UHV), which gave the well known herringbone pattern<sup>1</sup> (visible by low energy electron microscopy (LEEM) because of the high lateral resolution of the experiment: 6 nm<sup>2</sup>, see inset in Figure 1). Thin films of DIP were prepared in-situ by organic molecular beam deposition (evaporation rate = 3 Å/min) keeping the substrate at room temperature. No degradation of the samples was observed on the time scale of all presented results.

### References

- 1 J. V. Barth, H. Brune, G. Ertl and R. J. Behm, *Phys. Rev. B*, 1990, **42**, 9307.
- 2 Th. Schmidt, H. Marchetto, P. L. Levesque, U. Groh, F. Maier, D. Preikszas, P. Hartel, R. Spehr, G. Lilienkamp, W. Engel, R. Fink, E. Bauer, H. Rose, E. Umbach and H. J. Freund, *Ultramicroscopy*, 2010, **110**, 1358.

**Table 1**

|                                                           | Au(100) | Au(110) | Au(111) |
|-----------------------------------------------------------|---------|---------|---------|
| Surface atom densities (related to Au(111)) <sup>29</sup> | 0.866   | 0.612   | 1.000   |
| Surface energy (J/m <sup>2</sup> ) <sup>30</sup>          | 1.627   | 1.700   | 1.283   |

Surface atom densities and surface energy for Au(100), Au(110) and Au(111) surfaces.

Ref 29 and 30 as in the Communication:

29 K. W. Kolasinski, *Surface Science*, Wiley, England, 2008.

30 L. Vitos, A.V. Ruban, H. L. Skriver and J. Kollár, *Surf. Sci.* 1998, **411**, 186.
